1 **From drift to draft: How much do beneficial mutations actually contribute to**  
2 **predictions of Ohta's slightly deleterious model of molecular evolution?**

3

4

5 **Jun Chen<sup>\*,†</sup> Sylvain Glémin<sup>\*,§</sup>, Martin Lascoux<sup>\*,‡</sup>**

6 <sup>\*</sup>Program in Plant Ecology and Evolution, Department of Ecology and Genetics,  
7 Evolutionary Biology Centre, Uppsala University, 75236 Uppsala, Sweden

8 <sup>§</sup>Université de Rennes, CNRS, ECOBIO [Ecosystèmes, Biodiversité, Evolution] -

9 UMR 6553, F-35000 Rennes, France

10

11 <sup>†</sup>Present address: College of Life Sciences, Zhejiang University, Hangzhou, Zhejiang  
12 310058, China

13

14

15 <sup>‡</sup>Author for correspondence: [Martin.Lascoux@ebc.uu.se](mailto:Martin.Lascoux@ebc.uu.se)

1 **Abstract**

2 Since its inception in 1973 the slightly deleterious model of molecular evolution,  
3 aka the Nearly Neutral Theory of molecular evolution, remains a central model to  
4 explain the main patterns of DNA polymorphism in natural populations. This is  
5 not to say that the quantitative fit to data is perfect. In a recent study CASTELLANO  
6 *et al.* (2018) used polymorphism data from *D. melanogaster* to test whether, as  
7 predicted by the Nearly Neutral Theory, the proportion of effectively neutral  
8 mutations depends on the effective population size ( $N_e$ ). They showed that a  
9 nearly neutral model simply scaling with  $N_e$  variation across the genome could  
10 not explain alone the data but that consideration of linked positive selection  
11 improves the fit between observations and predictions. In the present article we  
12 extended their work in two main directions. First, we confirmed the observed  
13 pattern on a set of 59 species, including high quality genomic data from 11  
14 animal and plant species with different mating systems and effective population  
15 sizes, hence levels of linked selection. Second, for the 11 species with high quality  
16 genomic data we also estimated the full Distribution of Fitness Effects (DFE) of  
17 mutations, and not solely the DFE of deleterious mutations. Both  $N_e$  and  
18 beneficial mutations contributed to the relationship between the proportion of  
19 effectively neutral mutations and local  $N_e$  across the genome. In conclusion, the  
20 predictions of the slightly deleterious model of molecular evolution hold well for  
21 species with small effective population size. But for species with large  $N_e$  the fit is  
22 improved by incorporating linked positive selection to the model.

23

24 **Keywords:** Nearly Neutral Theory, Distribution of Fitness Effects, beneficial  
25 mutations, linked selection

26

## 1 **Introduction**

2

3 The year 2018 saw the celebration of the 50<sup>th</sup> anniversary of the Neutral Theory  
4 of molecular evolution (called simply the Neutral Theory thereafter). At 50 years  
5 of age, the Neutral Theory is still shrouded in controversies, some pronouncing it  
6 dead and overwhelmingly rejected by facts (Kern and Hahn 2018) while others  
7 see it as very much alive and kicking (NEI *et al.* 2010, JENSEN *et al.* 2019). As a  
8 quick glance at major textbooks in population genetics and at the literature  
9 would suggest, it seems fair to say that the Neutral Theory is certainly not totally  
10 dead. Even if it undoubtedly did lose some of its initial appeal it continues to play  
11 a central role in population genetics, a position well summarized by Kreitman  
12 (1996) in his spirited essay “The neutral theory is dead. Long live the neutral  
13 theory”. Shortcomings of the Neutral Theory were already noted in the 1970s  
14 and the Neutral Theory has itself evolved. Indeed, its inadequacy to fully explain  
15 the data, in particular Lewontin’s paradox (Lewontin 1974; Corbett-Detig *et al.*  
16 2015), was already noted in 1973, leading Tomoko Ohta (1973) to propose the  
17 Nearly Neutral Theory of molecular evolution. In contrast to the Neutral Theory  
18 where most mutations are assumed to be neutral or strongly deleterious, the  
19 Nearly Neutral Theory assigns much more prominence to the contribution to  
20 standing polymorphism of mutations that are weakly selected and effectively  
21 neutral (Ohta 1992; Ohta and Gillespie 1996). Weakly selected mutations can be  
22 slightly deleterious or slightly beneficial, but as noted by Kreitman (1996) the  
23 best developed of the weak selection models primarily consider slightly  
24 deleterious mutations and was therefore christened by him “the slightly  
25 deleterious model”. This is the model that we will be testing in most of the  
26 present paper.

27

28 Like the Neutral Theory, however, the Nearly Neutral Theory still assumes that  
29 “only a minute fraction of DNA changes in evolution are adaptive in nature”  
30 (Kimura 1983). Under this view, polymorphism is thought to be mostly  
31 unaffected by positive selection, except around the few recently selected  
32 beneficial alleles (selective sweep). This was already at variance with the view  
33 put forward by Gillespie (e.g. Gillespie 2004) that assigned a greater role to

1 linked positive selection in shaping polymorphism (see also Corbett-Detig *et al.*  
2 2015) and is in even stronger contrast with the claim by Kern and Hahn (2018)  
3 that “natural selection has played the predominant role in shaping within- and  
4 between-species genetic variation” and that “the ubiquity of adaptive variation  
5 both within and between species” leads to the rejection of the universality of the  
6 Neutral Theory. In a far more nuanced assessment of the Neutral Theory and its  
7 contribution, Jensen *et al.* (2018) argued that the effects of linked selection could  
8 readily be incorporated in the Nearly Neutral framework. The core of the dispute,  
9 either today or in the early days of the Nearly Neutral Theory, is about the  
10 degree to which each category of mutations contributed directly and indirectly to  
11 genetic variation within- and between-species.

12

13 A core prediction of the Nearly Neutral Theory is that the fraction of mutations  
14 affected by selection depends on  $N_e$  (Ohta 1973).  $N_e$  can vary among species but  
15 also within a genome because of linked selection (reviewed in Ellegren and  
16 Galtier 2016). The effect of selection against weakly deleterious mutations on  
17 linked neutral variants – Background selection (Charlesworth *et al.* 1993) – can  
18 be well approximated by a simple re-scaling of  $N_e$  whereas hitchhiking of  
19 beneficial or strongly deleterious mutations has more complex effects because  
20 there is not a single re-scaling (Barton 1995; Cvijovic *et al.* 2018). In the case of  
21 beneficial mutations, for instance, the interference depends both on the  
22 beneficial effect of the sweeping mutation and on selection acting at linked sites  
23 (Barton 1995; Weissman and Barton 2012).

24

25 Evidence that linked positive selection and not only direct selection on slightly  
26 deleterious and beneficial contributed to the relationship between the fraction of  
27 mutations affected by selection and  $N_e$  has recently been obtained by Castellano  
28 *et al.* (2018). Using two *Drosophila melanogaster* genome resequencing datasets,  
29 Castellano *et al.* (2018) tested a prediction of the slightly deleterious model first  
30 obtained by Kimura (1979) and then extended by Welch *et al.* (2008). Welch *et al.*  
31 (2008) showed that if one considers only deleterious mutations, the logarithm of  
32 the ratio of nucleotide diversity at non-synonymous and synonymous amino acid  
33 changes is linearly related to the logarithm of the effective population size and

1 that the slope of this log-log regression line is equal to the shape parameter of  
2 the Distribution of Fitness Effects (DFE),  $\beta$ , if the DFE of deleterious mutations is  
3 modeled by a Gamma distribution:

4

$$5 \ln(\pi_N/\pi_S) \approx -\beta \ln(N_e) + \text{constant} \quad [\text{Eq. 1a}]$$

6

7 Or, rewriting this expectation by using  $\pi_S$  as a proxy for  $N_e$ :

8

$$9 \ln(\pi_N/\pi_S) \approx -\beta \ln(\pi_S) + \text{constant}' \quad [\text{Eq. 1b}]$$

10

11 The second equation holds only if variation in  $\pi_S$  only depends on variation in  $N_e$ ,  
12 and does not depend on variation in mutation rates. It should also be pointed out  
13 that the DFE considered here only includes deleterious mutations, as estimated  
14 for instance by DFE-alpha (Eyre-Walker and Keightley 2009). A direct test of this  
15 prediction using among-species comparison can be problematic if mutation rates  
16 cannot be controlled for. To circumvent this problem, Castellano *et al.* (2018)  
17 used within genome variation in  $N_e$ , under the reasonable assumption that  
18 variation in mutation rates are negligible compared to variation in  $N_e$  across a  
19 genome. They found that the slope was significantly more pronounced than  
20 expected under a simple scaling of  $N_e$  and simulations indicated that linked  
21 positive selection, but not background selection, could explain this discrepancy.

22

23 In the present paper, we first confirmed the observed pattern on the set of 59  
24 species used in Chen *et al.* (2017). We then used 11 high quality genomic  
25 datasets for which an outgroup is available to test whether the results obtained  
26 by Castellano *et al.* (2018) hold more generally and, in particular, in species with  
27 much smaller effective sizes than *D. melanogaster*, and with different levels of  
28 linkage disequilibrium. While we adopted the same general approach than  
29 Castellano *et al.* (2018), our analysis differed from theirs in one important  
30 respect. In their study, Castellano *et al.* (2018) only characterized the DFE of  
31 deleterious mutations. We, instead, used a newly developed approach, *polyDFE*  
32 (Tataru *et al.* 2017), that also considers positive mutations, which is expected to

1 improve the estimation of the shape of the DFE of deleterious mutations and to  
2 disentangle the direct effects of both positive and negative selection.

3

#### 4 **Material & Methods**

5

##### 6 *Genomic data and regression of $\pi_N/\pi_S$ over $\pi_S$*

7

8 In a first step we analyzed the 59 species used in Chen *et al.* (2017). In later  
9 analyses that required unfolded site frequency spectra, we retained 11 species  
10 with high quality genomic datasets and with an available outgroup. These eleven  
11 species are given in Table 1. They include both animal and plant species with  
12 contrasted levels of nucleotide polymorphism and mating systems. We collected  
13 Single Nucleotide Polymorphism (SNPs) in all CDS regions and calculated genetic  
14 diversity of 4-fold and 0-fold sites as proxies for polymorphism at synonymous  
15 ( $\pi_S$ ) and non-synonymous sites ( $\pi_N$ ). We applied the same SNP sampling strategy  
16 as Castellano *et al.* (2018) in order to remove potential dependency between  
17 estimates of  $\pi_N/\pi_S$  and  $\pi_S$ . In brief, we first split all synonymous SNPs into three  
18 groups (S1, S2, and S3) using a hypergeometric sampling based on the total  
19 number of synonymous sites. To bin genes and reduce the difference in number  
20 of SNPs in each bin, we ranked genes according to their Watterson's estimate of  
21 nucleotide diversity ( $\theta_{S1}$ ) and grouped these ranked genes into 20 bins each  
22 representing approximately 1/20 of the total number of synonymous SNPs. We  
23 then used  $\pi_{S2}$  to estimate the  $\pi_N/\pi_S$  ratio and  $\pi_{S3}$  as an independent estimate of  
24 the genetic diversity of each bin.

25

26 We calculated the slope of the linear regression ( $l$ ) of the log-transformed value  
27 of the  $\pi_N/\pi_S$  ratio on the log-transformed value of  $\pi_S$ , using the "lm" function in R  
28 (R Core Team 2018). In pilot runs on 59 species (population data of Chen *et al.*  
29 (2017)), the estimates of  $l$  showed extensive variation depending on, among  
30 other things, the qualities of genome sequencing, read depth, annotation and SNP  
31 calling. Thus, we selected 11 species for which a high-quality genome sequence  
32 and an outgroup were available. Individuals were selected from the same genetic  
33 background, i.e. admixture or population structure were carefully removed. A

1 series of quality controls for  $l$  calculation were performed as described in the  
2 following. The longest transcript for each gene model was kept only if it  
3 contained both start and stop codons (putative full length) and no premature  
4 stop codons. SNPs within 5 base pairs were masked to avoid false positive calls.  
5 A grid of filtering criteria was also implemented on each species based on  
6 sequence similarity against Swiss-Prot database (e-value, bit-score, query  
7 coverage) and sequencing quality (sites with low read depth or ambiguous  
8 variants). We selected the filtering criteria in order to maximize the adjusted  $R^2$   
9 in the log-log regression of  $\pi_N/\pi_S$  on  $\pi_S$ . By doing so we aimed to reduce the error  
10 introduced by annotation and quality difference between model and non-model  
11 organisms. Also, to evaluate the variance introduced by random sampling and  
12 grouping of SNPs, we performed 1,000-iteration bootstraps to get the bootstrap  
13 bias-corrected mean and 95% confidence intervals for  $l$  calculations.

14

#### 15 *Estimates of the distributions of fitness effects*

16

17 The distribution of fitness effects (DFE) for all mutations across the genome was  
18 first calculated by considering only deleterious mutations. We first re-used the  
19 DFE parameters estimated in 59 animal and plant species in (Chen *et al.* 2017)  
20 that assumes that only neutral and slightly deleterious mutations contribute to  
21 genetic diversity. In brief, the probability of neutral/deleterious mutations under  
22 different selective strength was modeled using a gamma distribution with mean  
23  $S_d$  and shape parameter  $\beta$ . Folded site frequency spectra (SFS) were compared  
24 between synonymous and nonsynonymous sites and demography (or any  
25 departure from equilibrium) was taken into account for by introducing nuisance  
26 parameters (Eyre-Walker *et al.* 2006). The possible issues and merits of this  
27 approach compared to those based on an explicit (albeit very simplified)  
28 demographic model have been discussed previously and the method introduced  
29 by Eyre-Walker *et al.* (2006) has proved to be relatively efficient (Eyre-Walker  
30 and Keightley 2007; Tataru *et al.* 2017). The calculations were carried out using  
31 an in-house Mathematica script provided in supplementary S2 file of Chen *et al.*  
32 (2017).

33

1 However, for species with large effective population sizes, like *D. melanogaster*,  
2 ignoring the effects of beneficial mutations could distort the DFE to a great  
3 extent and lead to a wrong estimate of  $\beta$ . Therefore, we further estimated the  
4 DFE under a full model that takes both deleterious and beneficial mutations into  
5 account (Tataru *et al.* 2017). The model mixes the gamma distribution of  
6 deleterious mutations (shape= $\beta$ , mean= $S_d$ ) with an exponential distribution of  
7 beneficial mutations (mean= $S_b$ ), in proportions of  $(1-p_b)$  and  $p_b$ , respectively. The  
8 unfolded SFS was calculated for the 11 retained species, for which a closely  
9 related outgroup with similar sequencing quality was available to polarize the  
10 SFS. The “gamma” DFE (that only considers deleterious mutations) and the full  
11 DFE were estimated for each species. In both cases a nuisance parameter was  
12 also fitted to account for possible mis-assignment errors in SNP ancestral allele  
13 estimation (a step required to obtain the unfolded SFS). Parameters ( $\beta$ ,  $S_b$ ,  $S_d$ ,  
14 and  $p_b$ ) were estimated using a model averaging procedure where each  
15 parameter of interest is estimated as a weighted mean of estimates obtained  
16 under the Gamma DFE and full DFE models. The weights given to each estimate  
17 reflect the differences in the Akaike Information Criterion (AIC) scores of the  
18 Gamma DFE and full DFE models (Posada and Buckley 2004). Calculations were  
19 performed using the software *polyDFE* (Tataru *et al.* 2017).

20

### 21 *Expectations under different selection models*

22

23 Independently to possible indirect effects of selective sweeps, [Eq. 1] only  
24 considers deleterious mutations, in line with the initial view of the Nearly  
25 Neutral Theory where beneficial mutations negligibly contribute to  
26 polymorphism (Ohta 1973). Giving more weight to beneficial mutations slightly  
27 modified the relationship between the slope of the linear regression,  $l$ , and the  
28 shape parameter,  $\beta$ . For beneficial mutations only, the equivalent of [Eq. 1] is  
29 simply (see Appendix):

30

$$31 \ln(\pi_N/\pi_S) \approx +\beta_b \ln(N_e) + \text{constant} \quad [\text{Eq. 2}]$$

32



1 where  $\beta_b$  is the shape of the distribution of beneficial mutations (still assuming a  
2 gamma distribution). Thus, the  $\pi_N/\pi_S$  ratio increases with  $N_e$ , so that considering  
3 beneficial mutations the global  $\pi_N/\pi_S$  decreases more slowly than when only  
4 deleterious mutations are taken into account. Thus, with beneficial mutations the  
5 slope will always be lower than without. For the majority of species beneficial  
6 mutations are rare ( $p_b \ll 1$ ) and thus  $-l$  is approximately equal to  $\beta$ . For those  
7 with a relatively high proportion of beneficial mutations, direct positive selection  
8 should result in a flattened slope, i.e. a smaller value of  $-l$  than  $\beta$ . As we mostly  
9 observed the reverse pattern,  $-l > \beta$ , the observed discrepancy cannot be  
10 explained by the direct effect of beneficial mutations.

11

### 12 *Trends across the genome and tests for selection*

13

14 For each of the 20 bins defined above and ranked according to their mean  
15 synonymous nucleotide diversity we calculated  $\beta$ ,  $p_b$  and  $S_b$  values and a  
16 summary statistic of the site frequency spectrum, Tajima's D (Tajima 1989).  
17 Tajima's D tests for an excess of rare over intermediate variants compared to the  
18 frequencies expected under the standard coalescent. Demography does affect  
19 Tajima's D and can explain the difference among species. However, a negative  
20 Tajima's D is also expected under recurrent selective sweeps (Jensen *et al.* 2005;  
21 Pavlidis and Alachiotis 2017) and should be more negative in genomic regions  
22 more strongly affected by linked positive selection. Background selection can  
23 also affect Tajima's D in the same direction but much more weakly  
24 (Charlesworth *et al.* 1995). Independently of the species mean value, we thus  
25 expect a strong positive relationship between recombination and Tajima's D in  
26 species where linked positive selection is prominent.

27

### 28 *Forward simulations under selective sweep scenario*

29

30 The code developed by Castellano *et al.* (2018) which is based on forward  
31 simulations using software SLiM, version 3.2.1 (Haller and Messer 2019) was  
32 modified to assess the effect of parameters  $p_b$ ,  $S_b$ , and  $N_e$  on  $-l$  and Tajima's D.  
33 More specifically, a 20-kb non-recombining genomic region was simulated with a

1 mutation rate of  $1 \times 10^{-6}$  to study the behavior of  $-l$  and Tajima's D under selective  
2 sweep scenarios with varying parameters of  $p_b$ ,  $S_b$ , and  $N_e$ . First, we simulated  
3 equal amounts of neutral and deleterious mutations whose fitness effects were  
4 drawn from a gamma distribution with a shape parameter 0.4 and a mean  $s_d$  of -  
5 10. Different percentages of beneficial mutations ( $p_b = 1\%$ ,  $0.8\%$ ,  $0.5\%$ ,  $0.4\%$ ,  
6  $0.3\%$ ,  $0.2\%$ ,  $0.01\%$ , and  $0.005\%$ ,  $0$ ) were drawn randomly from a distribution  
7 with a fixed  $s_b$  of 1 to simulate loci experiencing selective sweeps at different  
8 frequency and we then calculated  $-l$  (Fig. 5 of Castellano et al (2018)) and  
9 Tajima's D. We also investigated the behavior of  $-l$  and Tajima's D by varying  $s_b$   
10 (1, 0.5, 0.1). Simulation samples were taken after an initial burn in period of  
11 1000 generations and values were averaged across 20 runs.

12

## 13 **Results**

14

15  *$-l$  and  $\beta$  are generally similar but the variance is large*

16

17 One of the most important predictions of the Nearly Neutral Theory is that the  
18 proportion of effectively neutral mutations is a function of the effective  
19 population size (Kimura and Ohta 1971; Ohta 1972; Ohta 1973; Ohta 1992). In  
20 species with large effective population size, selection is efficient and the  
21 proportion of effectively neutral mutations is small. Here we used the ratio of  
22 genetic diversity at 0-fold over 4-fold degenerate sites ( $\pi_N/\pi_S$ ) in protein coding  
23 regions as a measure of the proportion of effectively neutral mutations and  
24 examined the linearity between  $\log(\pi_N/\pi_S)$  and  $\log(N_e)$  across the genomes of 59  
25 species used in Chen *et al.* (2017). Although less than half of the species showed  
26 a significant regression coefficient ( $p$ -value $<0.05$ ), the coefficients were negative  
27 for 51 of them ( $l < 0$ ). The value of  $l$  varied from  $-0.424$  (*D. melanogaster*) to  $0.22$   
28 (*Callithrix jacchus*) and the linear relationship between  $\log(\pi_N/\pi_S)$  and  $\log(N_e)$   
29 was statistically significant in 28 species (Table S1). Since balancing selection can  
30 lead to both high  $\pi_S$  and  $\pi_N/\pi_S$ , it can generate an increase in  $\pi_N/\pi_S$  for high- $\pi_S$   
31 bins. We thus removed the five bins with the highest diversity and recalculated  $l$   
32 values for all species. This reduced the  $l$  values of 36 species and led to negative  $l$   
33 values in 55 species.

1

2 We further examined the DFE for mutations across the genome in the same  
3 datasets. A gamma distribution with two parameters, mean ( $S_d$ ) and shape ( $\beta$ ),  
4 was used to describe the distribution of deleterious mutations under purifying  
5 selection. Importantly, the contribution of beneficial mutations, even those under  
6 weak selection that are potentially behaving neutrally, is ignored in this case.  
7 Estimates of the shape parameter,  $\beta$ , varied from 0.01 (*C. jacchus*) to 0.347 (*D.*  
8 *melanogaster*) but were only weakly correlated with effective population size  
9 (Table S1).

10

11 Considering only deleterious mutations and assuming a simple scaling of  $N_e$   
12 variation across the genome, the slightly deleterious model predicts that the  
13 value of the slope of the linear regression between  $\log(\pi_N/\pi_S)$  and  $\log(N_e)$ ,  $-l$ , is  
14 equal to  $\beta$  (Welch *et al.* 2008). The discrepancy between the two might indicate a  
15 departure from this model, and Castellano *et al.* (2018) suggested that in *D.*  
16 *melanogaster*, where the observed slope was much larger than  $\beta$ , the departure  
17 was caused by linked positive selection across the genome. We observed a  
18 general consistency between  $\beta$  and  $-l$  as estimators of effective neutrality (linear  
19 coef. = 1.04, intercept=0.007, p-value<2e-16, adjusted R<sup>2</sup>=0.35, Fig. 1A). The  
20 difference ( $\Delta=-l-\beta$ ) was small in 40 species dataset and varied from -0.1 to 0.1  
21 (Fig. 1B). In 36 species (61%)  $-l$  values were larger than  $\beta$  and in 23 species (39%)  
22  $\beta$  was larger than  $-l$ . However, the variance of  $\Delta$  was not explained by  $\pi_S$  or  $N_e$  as  
23 the adjusted R<sup>2</sup> was only 0.06. Removing the five bins with the highest diversity,  
24 the correlation between  $\beta$  and  $-l$  was still significant (coef. 0.89, p-value=2.14e-6).  
25 The median value of  $\Delta$  increased from 0.0085 to 0.045 but there was still no  
26 correlation between  $\Delta$  and  $N_e$ .

27

### 28 *The effects of quality control and full DFE model*

29

30 The variance in  $\Delta$  may come from two sources. First, it can be due to the  
31 estimation quality of  $-l$  and  $\beta$ . Tests have shown that quality control on  
32 sequencing and SNP-calling can have a dramatic influence on  $-l$  calculations and  
33 ignoring beneficial mutations in DFE model could also distort the estimates of  $\beta$

1 (Tataru *et al.* 2017). Second, the variance in  $\Delta$  can be caused by departures from  
2 the assumptions underlying the simple version of the Nearly Neutral Theory, for  
3 instance a larger role of direct or linked positive selection than assumed by the  
4 theory.

5

6 To assess the relative importance of these two sources we selected 11 species  
7 with genomic data of high quality and performed a series of stringent quality  
8 controls (see details in M&M) before re-estimating  $-l$ . This improved the  
9 goodness of fit for the log linear regression between  $\pi_N/\pi_S$  and  $\pi_S$  across the  
10 genome and  $-l$  estimates were significantly different from zero for all 11 species  
11 (Table 1, see also details in Table S2). For estimating  $\beta$ , we used closely related  
12 species to polarize the SFS and applied both the gamma DFE model and the full  
13 DFE model implemented in *polyDFE*, which considers both deleterious and  
14 beneficial mutations. Instead of choosing the best DFE model, an average value  
15 weighted by the different models' AIC scores was calculated for each parameter  
16 (Tataru and Bataillon 2019).

17

18 The linear regression model in this case explained a much higher proportion of  
19 the variance between  $-l$  and  $\beta$  (adjusted  $R^2=0.477$ ) than when we considered the  
20 59 species and used only a gamma DFE. In addition, considering beneficial  
21 mutations slightly increases  $\beta$  estimates, making them closer to  $-l$ . However, the  
22 linear coefficient between  $-l$  and  $\beta$  (1.26) is significantly higher than one and the  
23 variation of  $\Delta$  remained large ( $-0.026 \sim 0.289$ ) suggesting that some additional  
24 factors may lie behind the remaining variation.

25

26 *The roles of effective population size and positive selection*

27

28 We then tested if the variation in  $\Delta$ , where  $\Delta=-l-\beta$ , could simply reflect  
29 differences in effective population size ( $N_e$ ) among species. Estimates of  $N_e$  were  
30 obtained by rescaling  $\pi_S$  using estimates of the mutation rate ( $\mu$ ) from the  
31 literature. When  $\Delta$  is regressed against  $\log(N_e)$ ,  $\log(N_e)$  explained up to 49% of  
32 the variance in  $\Delta$  ( $p$ -value=0.014). Considering the uncertainty in  $\mu$ , we also

1 regressed  $\Delta$  on  $\log(\pi_s)$ , and obtained similar results ( $R^2=0.41$ ,  $p$ -value=0.019,  
2 Fig.2).

3

4 Furthermore, we tested whether species with potentially more selective sweeps  
5 show higher  $\Delta$ , as predicted by Castellano *et al.* (2018). An explicit model of  
6 selective sweeps is difficult to fit given the uncertainty about beneficial  
7 mutations parameters and would require additional information, especially on  
8 the recombination map of the different species. Alternatively, we qualitatively  
9 reason that, in addition to be more frequent when the effective population is  
10 large, the number of selective sweeps should increase with both the proportion  
11 ( $p_b$ ) and the mean strength of beneficial mutations ( $S_b$ ).  $\log(S_b)$  had a significant  
12 and positive effect on  $\Delta$  ( $p$ -value=0.0018, Fig. 2) and explained 64.3% of the  
13 variance in  $\Delta$  but the effect of  $p_b$  was not significant ( $p$ -value=0.29). When  
14 considered together, the effects of both  $\log(S_b)$  and  $\log(\pi_s)$  (or  $N_e$ ) in the joint  
15 model explained up to 78% of the variance in  $\Delta$  ( $p$ -value=0.0068 and 0.059,  
16 respectively, Table 2). However, no significant effect of  $p_b$  could be detected  
17 either in the single regression model ( $p$ -value=0.29) or joint model with other  
18 variables ( $p$ -value=0.15).

19

#### 20 *Trends across the genome and tests for selection*

21

22 Variation of DFE parameters across bins could also explain the difference  
23 between  $\beta$  and  $-l$  as the underlying assumptions is that  $\beta$  is constant across bins.  
24 We thus calculated  $\beta$  for all 20 bins for the 11 species. Seven species had  $\beta$  values  
25 increasing weakly with genetic diversity ( $p$ -value<0.05, mean coef.=0.056) while  
26 *C. grandiflora* and *H. timareta* had a much faster increase (coef.=0.2 and 0.15,  
27 respectively, Table 3). In five species, the maximum  $\beta$  value was still lower than  
28 the slope, similar to what was obtained by Castellano *et al.* (2018) in *Drosophila*.  
29 However, the maximum  $\beta$  value was larger than the slope in the six remaining  
30 species and in five cases the maximum  $\beta$  value was larger than 1 (Table 1). We  
31 also compared  $p_b$  and  $S_b$  values across bins. In *A. thaliana*  $p_b$  increased slowly  
32 with diversity whereas in *C. grandiflora*, *S. huaylasense*, and *D. melanogaster*  $p_b$   
33 decreased significantly ( $p$ -value<0.05). In all 11 species,  $S_b$  did not show any

1 significant trend across bins. To more formally test for the significance of these  
2 variations, we also divided the genomes into five bins (to get enough power per  
3 bin) and tested the invariance of the DFE across bins using likelihood ratio tests  
4 as implemented in *polyDFE*. For all species, a model with independent DFE  
5 parameters for each bin is significantly better than a model with shared  
6 parameters across bins (see Table S3).

7

8 For all 11 selected species we also calculated Tajima's D (Tajima 1989),  
9 thereafter simply called D, in each bin to test for departure from neutrality  
10 across the genome. Mean values of D were slightly negative across bins for most  
11 species except *S. habrochaites*. For nine of the eleven species, D values increased  
12 significantly with genetic diversity (Table 3). Interestingly, we found a negative  
13 and strong correlation of Tajima's D with  $\log(S_b)$  for all 11 species (p-  
14 value=0.0086, Pearson's correlation coef. =-0.74) but not with any other DFE  
15 parameters. This is in agreement with the expectation that selective sweeps  
16 decrease D. We further tested the trends of positive and negative selections by  
17 calculating the proportions of deleterious or beneficial mutations over all bins  
18 with selective strength  $<-10$  and  $>10$ , respectively. However, no significant  
19 trends were identified for either kind of direct selections.

20

21 We also tested whether alternative measures of the possible occurrence of  
22 selective sweeps can also explain the variation in  $\Delta$ . First we used both the mean  
23 Tajima's D and the among-genome correlation between D and  $\pi_S$  ( $\rho_D$ ) as  
24 predictors. More negative D and stronger positive correlation between D and  $\pi_S$   
25 can be viewed as signature of stronger hitchhiking effects. So we predict a  
26 negative effect of D and a positive effect of  $\rho_D$ . In combination with  $\pi_S$  (or  $N_e$ ),  
27 both D and  $\rho_D$  significantly explain variation in  $\Delta$  (adjusted  $R^2=0.76$ , Table 2).

28

## 29 *Simulations*

30

31 Castellano (2018) used forward simulation to assess how  $-l$  increased under a  
32 selective sweep model with varying frequency of adaptive mutations (their Fig.  
33 5). We extended their investigation to assess the effect of selective strength ( $S_b$ )

1 on  $-l$  with a fixed  $\beta$  (0.4) and how selective strength ( $s_b$ ) also affected estimates of  
2 Tajima's D. Fig. 3 shows that when  $s_b$  increased from 0.1 to 1,  $-l$  increased from  
3 0.48 to 0.82 ( $\Delta=0.08$  to 0.42). As expected mean Tajima's D decreased as  $s_b$   
4 increased but the correlation between D and  $\pi_S$  was only slightly affected ( $\rho_D$ , see  
5 also Table 4). We also increased N from 100 to 500, and to 1000, and fixed the  
6 mean selective strength at either  $S_b = 10$  or  $S_d = -1000$ . With these parameters  
7 the strength of selection is not affected by N but the number of sweeps increased  
8 with N due to the higher input of (beneficial) mutations. In this case  $\Delta$  increased  
9 from 0.079 to 0.75 as N increased and Tajima's D again decreased (Table 4).

10

## 11 **Discussion**

12

13 The aim of the present study was to test quantitatively one of the predictions of  
14 the Nearly Neutral Theory of molecular evolution or more precisely the slightly  
15 deleterious model, namely that the strength of selection varies with local  
16 variations in  $N_e$  across the genome depending on the shape of the DFE. We  
17 showed that neglecting linked positive selection could lead to a significant  
18 quantitative discrepancy between predictions and observations, especially when  
19 the effective population size is large. On the other hand, the slightly deleterious  
20 model appears as a good approximation when the effective population size is  
21 small. Below we first consider possible caveats and discuss the implications of  
22 the results for the relative importance of purifying and adaptive selection in  
23 shaping the genetic diversity of species.

24

### 25 *Caveats: the variation of $l$ and $\beta$*

26

27 In general, estimates of the DFE shape parameter,  $\beta$ , were rather stable  
28 compared to estimates of the slope of the regression of  $\log(\pi_N/\pi_S)$  over  $\log(\pi_S)$ ,  $l$ ,  
29 with the variance of the former being half that of the latter independently of  
30 quality control and whether the SFS was folded or unfolded. High variation in  $l$   
31 estimates may explain the fact that a significant correlation between  $\pi_N/\pi_S$  and  
32  $\pi_S$  could not be observed for all species, particularly those with low genetic  
33 diversity (e.g. great apes). Therefore, a stringent quality control for read

1 alignment and SNP calling is necessary even for *D. melanogaster*, where an  
2 improvement of the fit in  $l$  calculation (linear regression adjusted  $R^2=0.79$  to  $0.95$ )  
3 leads to a dramatic change in the estimate of  $\Delta$  (from  $0.077$  to  $0.29$ ). Even if a  
4 stringent quality control had been implemented, the goodness of fit for the log  
5 linear regression leading to the estimation of  $l$  would differ significantly from  
6 species to species. The fit across the *D. melanogaster* and *A. thaliana* genomes  
7 was almost perfect ( $R^2>0.95$ ) while, at the other extreme, the fit was rather poor  
8 in *S. habrochaites* ( $R^2=0.38$ ). However, even among species for which the fit is  
9 almost perfect ( $R^2>0.95$ )  $l$  could vary rather dramatically: *D. melanogaster* had a  
10 much larger  $l$  ( $0.7$ ) than *A. thaliana* ( $0.48$ ), *C. rubella* ( $0.43$ ), and *Z. mays* (teosinte,  
11  $0.29$ ), whereas  $\beta$  only changed marginally for these species.

12

13 On the other hand, we noticed that not all species showed a significant linear  
14 relationship between  $\pi_N/\pi_S$  and  $N_e$  or even had positive slopes, especially for  
15 those of low diversity (e.g. great apes, Fig 2). Therefore, besides purifying  
16 selection  $l$  is also likely to be affected by additional factors.

17

18 A possible source of variance in  $\beta$  could be that the single-sided gamma  
19 distribution does not describe well the real DFE curves, at least not for all species,  
20 particularly when the DFE is not unimodal (Tataru *et al.* 2017). For species like *D.*  
21 *melanogaster*, for instance, there is mounting evidence of adaptive evolution  
22 (reviewed in Eyre-Walker 2006). Therefore, it is necessary to consider the  
23 possible contribution of beneficial mutations. The full DFE model provided a  
24 much better fit than the gamma DFE that considers only deleterious mutations in  
25 *D. melanogaster* (log likelihood=  $-187.3$  versus  $-245.7$ , respectively). This was  
26 also true of some of the outcrossing plants like *Capsella grandiflora*, and *Solanum*  
27 *huaylasense*. In all three species  $\beta$  estimates increased when estimated with the  
28 Full DFE instead of the Gamma DFE, sometimes significantly (from  $0.33$  to  $0.41$  in  
29 *D. melanogaster* (Rwanda) and  $0.15$  to  $0.31$  in *S. huaylasense*) and at other times  
30 only marginally ( $0.27$  to  $0.30$  in *C. grandiflora*). Taking beneficial mutations into  
31 account when fitting the shape of the DFE can partly reduce the discrepancy  
32 between  $\beta$  estimates and the slope of the regression. However, it is not sufficient  
33 as  $\Delta$  was positive in 10 over the 11 focal species we studied.



1

2 *Considering positive selection improves the prediction*

3

4 Based on the prediction of the Nearly Neutral Theory with direct positive  
5 selection (Equation 2), the proportion of beneficial mutations is the only factor  
6 that could alter the relationship between  $l$  and  $\beta$  and should always result in a  
7 larger  $\beta$  compared to  $-l$ . However, this is usually not the case as, on the contrary,  
8 values of  $-l$  larger than  $\beta$  have generally been reported (Chen *et al.* 2017; James *et*  
9 *al.* 2017; Castellano *et al.* 2018). In this paper we systematically investigated this  
10 relationship across the genomes of multiple species. Two thirds of the 59 species  
11 and 10 out of the subset of eleven species that were selected for the high quality  
12 of their genome, had larger  $-l$  than  $\beta$  values. Hence direct positive selection is not  
13 the main cause of the discrepancy.

14

15 Investigation of DFE parameters changes across bins may help to identify  
16 changes in natural selection. Increasing  $\beta$  values over bins could be a signal for  
17 stronger positive selection in low diversity regions. Although the maximum  $\beta$   
18 value of some species can be larger than  $-l$ ,  $\beta$  grows slowly for most species and  
19 shows hardly any pattern between species. Neither did  $p_b$  or  $S_b$ . This lack of  
20 significant trend in these parameters could simply be due to an increase in  
21 variance of their estimates as only one twentieth of the total number of  
22 polymorphic sites were used for DFE calculations in each bin. It could also again  
23 suggest that direct selection is not the main cause of the discrepancy.

24

25 One of the main findings of the present study is that a large proportion of  
26 variance in the discrepancy can be explained by the estimated strength of  
27 positive selection, which can be regarded as an indication for linked selection,  
28 such as selective sweeps or more generally hitchhiking effects. To test for that,  
29 we compared changes in Tajima's  $D$  and its among-genome correlation  
30 coefficients over bins. As expected we observed a negative effect of  $D$  and a  
31 positive effect of  $\rho_D$  on  $\Delta$ , both suggesting the presence of linked selection, with  
32 lower diversity at nearby sites and thus increased discrepancy between  $-l$  and  $\beta$ .  
33 This is also in agreement with our simulations and those of Castellano *et al.*

1 (2018) that illustrate that hitchhiking effects can lower the genetic diversity at  
2 nearby neutral or nearly neutral positions. These results can be understood  
3 because selective sweep effects cannot simply be captured by a rescaling of  $N_e$ .  
4 Selective sweeps not only reduce genetic diversity at linked sites but also distort  
5 the coalescent genealogy (Fay and Wu 2000; Walsh and Lynch 2018; Campos  
6 and Charlesworth 2019), so that we cannot define a single  $N_e$  in this context  
7 (Weissman and Barton 2012). In particular, the scaling is not expected to be the  
8 same for neutral or weakly selected polymorphisms. However, as far as we know,  
9 there is no quantitative model predicting the value of the slope as a function of  
10 DFE, rates of sweep and recombination rates, and such models still need to be  
11 developed.

12

### 13 **Conclusions**

14

15 There are three major conclusions to the present study. First, the Nearly Neutral  
16 Theory in its initial form may not explain all aspects of polymorphisms but,  
17 almost 50 years after it was first proposed by Tomoko Ohta (Ohta 1973), it still  
18 constitutes an excellent starting point for further theoretical developments  
19 (Galtier 2016; Walsh and Lynch 2018). Second, considering linked beneficial  
20 selection indeed helps to explain more fully polymorphism data, and this is  
21 especially true for species with high genetic diversity. This can explain both  
22 patterns of synonymous polymorphism (Corbett-Dettig et al. 2015) and how  
23 selection reduces non-synonymous polymorphism (Castellano et al. 2018, this  
24 study). One could have a progressive increase of the effect of selective sweeps as  
25 suggested by Walsh and Lynch (2018, chapter 8) with a shift from genetic drift to  
26 genetic draft (Gillespie 1999; 2000; 2001). If so, we could have three domains.  
27 For small population sizes, drift would dominate and the nearly neutral theory in  
28 its initial form would apply. For intermediate population sizes beneficial  
29 mutations would start to play a more important part, and finally for large  
30 population sizes, the effect of selective sweeps would dominate and draft would  
31 the main explanation of the observed pattern of diversity. Third, our study once  
32 more emphasizes the central importance of the DFE in evolutionary genomics  
33 and we will likely see further developments in this area.

1

2 **Acknowledgements:** We thank Thomas Bataillon and David Castellano for  
3 comments on earlier versions of the manuscript. The project was in part  
4 supported by grants from the Swedish Research Council and the Swedish  
5 Foundation for Strategic Research to ML.

1 **Table 1** Species and datasets used in the present study

2

| Species                   | Ref.                               | Outgroup               | Ref.                                | Mating type | AIC                  | $l$  | $\beta_{full}$ | $\beta_{gamma}$<br><small><math>a</math></small> | $\beta_{max}$ |
|---------------------------|------------------------------------|------------------------|-------------------------------------|-------------|----------------------|------|----------------|--------------------------------------------------|---------------|
| <i>A. thaliana</i>        | ALONSO-BLANCO <i>et al.</i> (2016) | <i>A. lyrata</i>       | (NOVIKOVA <i>et al.</i> 2016)       | selfing     | 231.3, 227.3         | 0.48 | 0.32           | 0.32                                             | 0.45          |
| <i>A. lyrata</i>          | (NOVIKOVA <i>et al.</i> 2016)      | <i>A. thaliana</i>     | ALONSO-BLANCO <i>et al.</i> (2016)  | outcrossing | 247.4, 243.4         | 0.50 | 0.35           | 0.34                                             | 0.36          |
| <i>C. rubella</i>         | (KOENIG <i>et al.</i> 2018)        | <i>C. grandiflora</i>  | (AGREN <i>et al.</i> 2014)          | selfing     | 201.4, 200.3         | 0.43 | 0.39           | 0.26                                             | 2.86          |
| <i>C. grandiflora</i>     | (AGREN <i>et al.</i> 2014)         | <i>C. rubella</i>      | (KOENIG <i>et al.</i> 2018)         | outcrossing | <b>321.9</b> , 327.8 | 0.52 | 0.30           | 0.27                                             | 0.36          |
| <i>S. habrochaites</i>    | AFLITOS <i>et al.</i> (2014)       | <i>S. lycopersicon</i> | AFLITOS <i>et al.</i> (2014)        | selfing     | <b>141.5</b> , 148.1 | 0.21 | 0.23           | 0.13                                             | 3.61          |
| <i>S. huaylasense</i>     | AFLITOS <i>et al.</i> (2014)       | <i>S. lycopersicon</i> | AFLITOS <i>et al.</i> (2014)        | outcrossing | <b>87.1</b> , 121.5  | 0.54 | 0.31           | 0.15                                             | 3.89          |
| <i>S. propinquum</i>      | MACE <i>et al.</i> (2013)          | <i>S. bicolor</i>      | MACE <i>et al.</i> (2013)           | selfing     | 163.8, 159.8         | 0.37 | 0.26           | 0.26                                             | 0.34          |
| <i>Z. mays</i> (teosinte) | CHIA <i>et al.</i> (2012)          | <i>T. dactyloides</i>  | CHIA <i>et al.</i> (2012)           | outcrossing | 208.1, 204.1         | 0.29 | 0.19           | 0.18                                             | 0.45          |
| <i>P. trichocarpa</i>     | EVANS <i>et al.</i> (2014)         | <i>P. nigra</i>        | (FAIVRE-RAMPANT <i>et al.</i> 2016) | outcrossing | 318.9, 319.6         | 0.42 | 0.22           | 0.16                                             | 2.21          |
| <i>D. melanogaster</i>    | HUANG <i>et al.</i> (2014)         | <i>D. simulans</i>     | STANLEY AND KULATHINAL (2016)       | outcrossing | <b>422.7</b> , 535.5 | 0.70 | 0.41           | 0.33                                             | 0.51          |
| <i>H. timareta</i>        | MARTIN <i>et al.</i> (2013)        | <i>H. melpomene</i>    | MARTIN <i>et al.</i> (2013)         | outcrossing | 208.2, 204.2         | 0.44 | 0.21           | 0.21                                             | 2.78          |

3 Note: AIC values were estimated by *polyDFE* for models with and without the effects of beneficial mutations, respectively (bold numbers showed significance <

4 0.05). So it is with  $\beta_{full}$  and  $\beta_{gamma}$  as well.  $\beta_{max}$  were the maximum value of those estimated by *noIvDFE* for each ranked gene bin.

1 **Table 2** Summary table of multiple regression analyses of the effects of  $\pi_S$ ,  $S_b$ ,  
 2 Tajima's D, and  $\rho_D$  on  $\Delta$ , the difference between  $-l$  and  $\beta$ .

3

| $\Delta \sim \pi_S + \log_{10}(S_b)$ | <i>Coef.</i>                     | <i>SE</i> | <i>t value</i> | <i>p-value</i> |
|--------------------------------------|----------------------------------|-----------|----------------|----------------|
| Intercept                            | 0.14                             | 0.031     | 4.69           | 0.0016**       |
| $\pi_S$                              | 7.93                             | 2.96      | 2.68           | 0.028*         |
| $\log_{10}(S_b)$                     | 0.015                            | 3.6e-3    | 4.24           | 0.0029**       |
| p-value: 0.0008144                   | Adjusted R <sup>2</sup> : 0.7888 |           |                |                |
| $\Delta \sim \pi_S + D + \rho_D$     |                                  |           |                |                |
| Intercept                            | -0.031                           | 0.035     | -0.87          | 0.41           |
| Tajima's D                           | -0.10                            | 0.042     | -2.39          | 0.048*         |
| $\rho_D$                             | 0.0015                           | 6.05e-4   | 2.56           | 0.038*         |
| $\pi_S$                              | 15.80                            | 3.39      | 4.65           | 0.0040**       |
| p-value: 0.002978                    | Adjusted R <sup>2</sup> : 0.708  |           |                |                |

4  
 5 \*\*\*:  $p < 0.001$ , \*\*:  $0.001 < p < 0.01$ , \*:  $0.01 < p < 0.05$ , ∙:  $0.05 < p < 0.1$

6  
 7  
 8  
 9  
 10  
 11  
 12  
 13  
 14  
 15  
 16  
 17  
 18  
 19  
 20  
 21  
 22  
 23  
 24  
 25  
 26  
 27  
 28  
 29  
 30  
 31  
 32

1 **Table 3** Changes of summary statistics and DFE parameters across 20 rank gene  
 2 groups.

3

|                        | Tajima's D |                      | $\rho\beta^a$        | $\rho p_b^a$            |
|------------------------|------------|----------------------|----------------------|-------------------------|
|                        | median     | $\rho D^a$           |                      |                         |
| <i>A. thaliana</i>     | -0.38      | 20.10 <sup>***</sup> | 0.033 <sup>***</sup> | 9.65e-4 <sup>**</sup>   |
| <i>A. lyrata</i>       | -0.60      | 30.13 <sup>***</sup> | 0.057 <sup>*</sup>   | 7.75e-5                 |
| <i>C. rubella</i>      | -0.28      | 15.75 <sup>*</sup>   | 0.039 <sup>*</sup>   | 8.26e-4                 |
| <i>C. grandiflora</i>  | -1.06      | 23.02 <sup>**</sup>  | 0.20 <sup>***</sup>  | -3.53e-3 <sup>*</sup>   |
| <i>S. habrochaites</i> | 0.22       | -5.36                | 0.11                 | -7.48e-3                |
| <i>S. huaylasense</i>  | -0.17      | -8.59 <sup>**</sup>  | -0.32                | -5.54e-2 <sup>***</sup> |
| <i>S. propinquum</i>   | -0.10      | 60.04 <sup>***</sup> | 0.075 <sup>***</sup> | 1.82e-3                 |
| <i>Z. mays</i>         | -0.52      | -0.39                | 0.055 <sup>***</sup> | 2.39e-3                 |
| <i>P. trichocarpa</i>  | -0.43      | 79.20 <sup>***</sup> | 0.079                | -2.80e-3                |
| <i>D. melanogaster</i> | -0.73      | 7.41 <sup>**</sup>   | 0.078 <sup>***</sup> | -3.81e-3 <sup>***</sup> |
| <i>H. timareta</i>     | -0.10      | 6.58 <sup>**</sup>   | 0.15 <sup>***</sup>  | 9.87e-4                 |

4

5 a:  $\rho$  is the slope of the regression of D ( $\beta$ , and  $p_b$ , respectively) over genetic  
 6 diversity across ranked groups of genes.

7 \*\*\*:  $p < 0.001$ , \*\*:  $0.001 < p < 0.01$ , \*:  $0.01 < p < 0.05$ , <sup>\*</sup>:  $0.05 < p < 0.1$

8

9

10

11

12

13

14

15

16

17

18

19

20

21

22

23

24

25

26

27

28

29

30

31

1 **Table 4** Results of forward simulations showing the effect of linked positive selection  
2 on  $-l$ ,  $\Delta$  and summary statistics of the site frequency spectrum for different  
3 values of the mean selective value of beneficial mutations,  $S_b$  and the population size,  
4  $N$ .  $\rho_D$  is the correlation between  $\pi_S$  and Tajima's D.

5

| N    | $S_b$ | $S_d$ | $\beta$ | $-l$   | $\Delta$ | $\pi_S$ | $\pi_N/\pi_S$ | $\rho_D$ | Tajima D |
|------|-------|-------|---------|--------|----------|---------|---------------|----------|----------|
| 100  | 20    | 1000  | 0.4     | -0.485 | 0.085    | 0.00136 | 0.107         | 9.43E-04 | -0.00029 |
| 100  | 50    | 1000  | 0.4     | -0.664 | 0.264    | 0.00122 | 0.130         | 1.02E-03 | -0.00033 |
| 100  | 100   | 1000  | 0.4     | -0.822 | 0.422    | 0.00101 | 0.161         | 8.39E-04 | -0.00042 |
| 100  | 10    | 1000  | 0.4     | -0.479 | 0.079    | 0.00153 | 0.100         | 1.12E-03 | -0.00024 |
| 500  | 10    | 1000  | 0.4     | -0.491 | 0.091    | 0.00580 | 0.096         | 1.28E-03 | -0.00047 |
| 1000 | 10    | 1000  | 0.4     | -0.749 | 0.349    | 0.00948 | 0.100         | 1.20E-03 | -0.00058 |

6

1  
2 **Figures**  
3

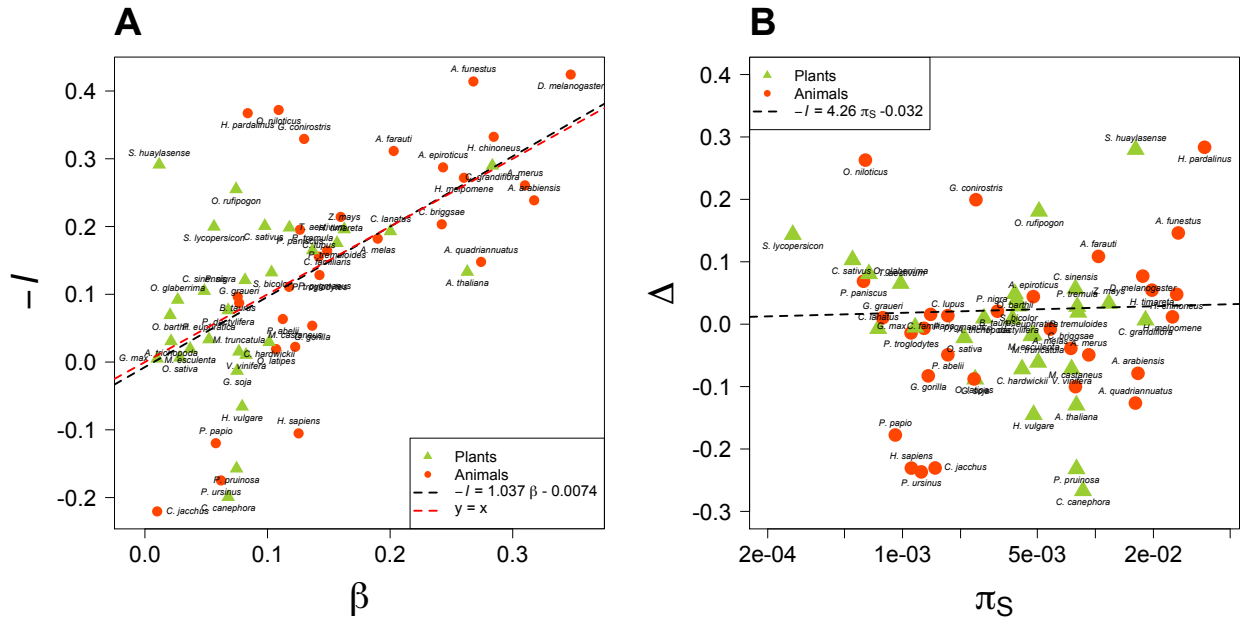

4  
5 **Fig. 1** (A) The correlation between the observed slope of the regression of  
6  $\log(\pi_N / \pi_S)$  over  $\pi_S$ ,  $-l$ , and the shape parameter of the DFE,  $\beta$ , from the 59  
7 species in Chen *et al.* (2017). (B) The distribution of  $\Delta (= -l - \beta)$  against genetic  
8 diversity at synonymous sites.  $\beta$  values were estimated from DFE models with  
9 only deleterious mutations considered (the gamma distribution).

10  
11



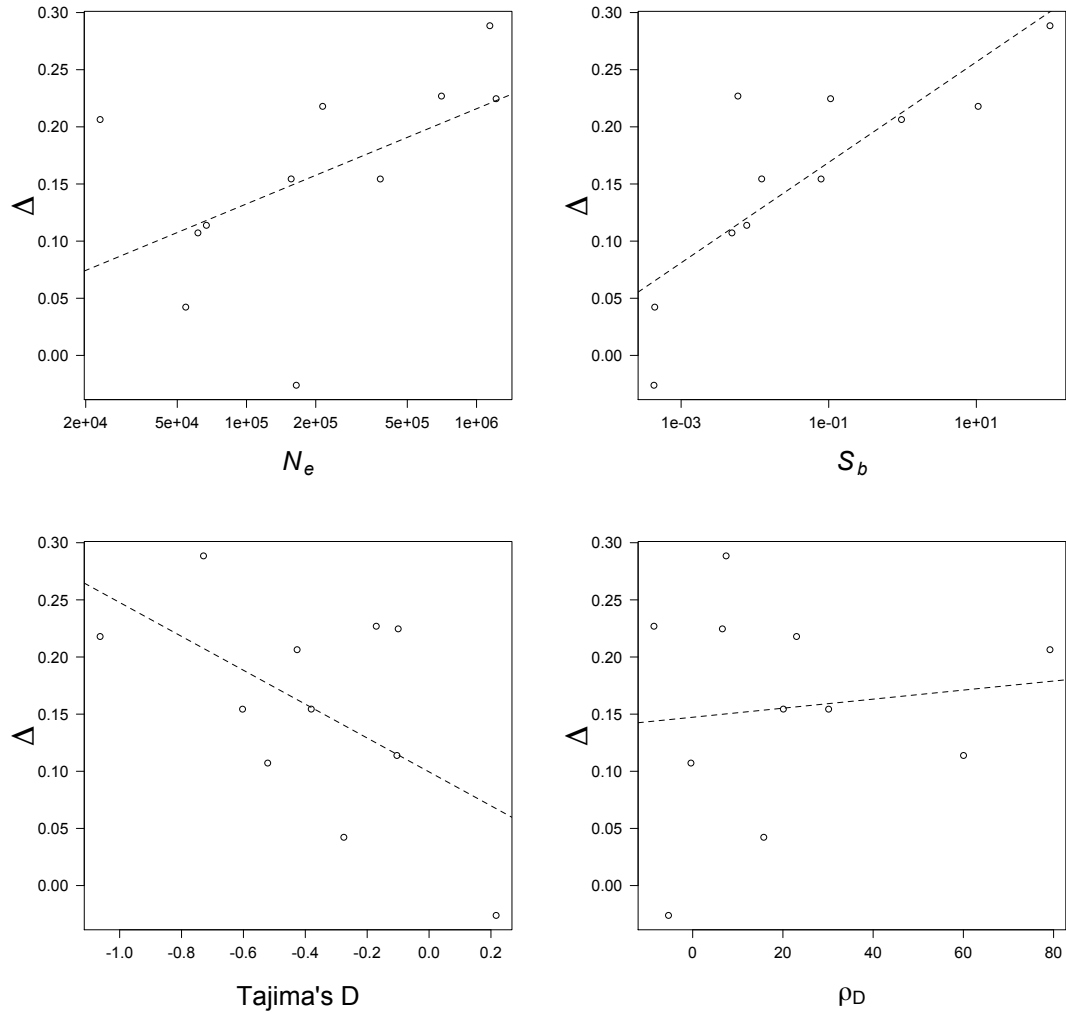

1

2 **Fig. 2** The relationship between  $\Delta$  ( $=-l-\beta$ ) and effective population size  $N_e$ ,  
3 selective strength  $S_b$ , Tajima's D and the trend of D across bins  $\rho_D$  for 11 selected  
4 species. Dotted lines showed the linear regression line.  $\beta$  and  $S_b$  values were  
5 estimated from full DFE models with both deleterious and beneficial mutations  
6 considered (full DFE model with both gamma and exponential distributions).

7

8

9

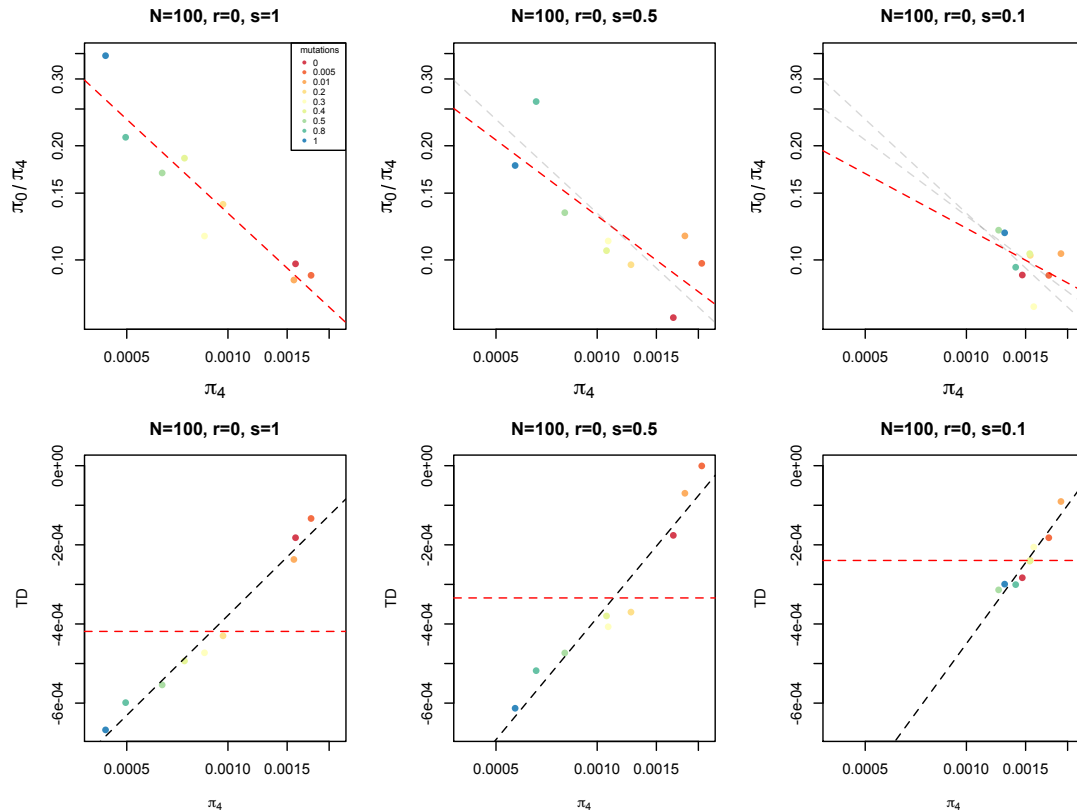

1

2 **Fig. 3** Effect of linked positive selection on the relationship between  $\log(\pi_N/\pi_S)$   
 3 and  $\log(N_e)$  and Tajima's D. Upper row: The linear regression coefficient ( $-l$ )  
 4 between  $\log(\pi_N/\pi_S)$  and  $\log(N_e)$  increases with increasing positive selective  
 5 strength (from left to right). The red lines are the regression lines. For  $s=0,5$  and  
 6  $s=0.1$  the regression lines corresponding to larger  $s$  values are indicated with  
 7 gray lines. Lower row: The red lines for Tajima's D panels indicate the mean  
 8 values.

9

10

11 **Supplementary Information**

12

13 **Supplementary table legends**

14

15 **Table S1.** The 59 species used to compare the difference between  $-l$  and  $\beta$   
 16 assuming a gamma model for DFE. See Chen et al. (2017) for further details.

17

1 **Table S2.** Details of the 11 species used in the current study to compare the  
2 difference between  $-l$  and  $\beta$  assuming a full model (gamma + exponential) for the  
3 DFE.

4

5 **Table S3.** Test for the invariance of DFE parameter estimates across bins by  
6 comparing the log-likelihoods of independent estimates for each bin against those of  
7 shared estimates.

8

9

10

## 1   **References**

- 2   Aflitos, S., E. Schijlen, H. de Jong, D. de Ridder, S. Smit *et al.*, 2014 Exploring  
3       genetic variation in the tomato (*Solanum* section *Lycopersicon*) clade by  
4       whole-genome sequencing. *Plant Journal* 80: 136-148.
- 5   Ågren, J. A., W. Wang, D. Koenig, B. Neuffer, D. Weigel *et al.*, 2014 Mating system  
6       shifts and transposable element evolution in the plant genus *Capsella*.  
7       *Bmc Genomics* 15:602.
- 8   Alonso-Blanco, C., J. Andrade, C. Becker, F. Bemm, J. Bergelson *et al.*, 2016 1,135  
9       Genomes Reveal the Global Pattern of Polymorphism in *Arabidopsis*  
10      *thaliana*. *Cell* 166: 481-491.
- 11   Barton, N. H., 1995 Linkage and the Limits to Natural-Selection. *Genetics* 140:  
12      821-841.
- 13   Campos, J. L., and B. Charlesworth, 2019 The effects on neutral variability of  
14      recurrent selective sweeps and background selection. *Genetics* (in press).
- 15   Castellano, D., J. James and A. Eyre-Walker, 2018 Nearly Neutral Evolution Across  
16      the *Drosophila melanogaster* Genome. *Molecular Biology and Evolution*  
17      35: 2685-2694.
- 18   Charlesworth, B., M. T. Morgan and D. Charlesworth, 1993 The Effect of  
19      Deleterious Mutations on Neutral Molecular Variation. *Genetics* 134:  
20      1289-1303.
- 21   Chen, J., S. Glemin and M. Lascoux, 2017 Genetic Diversity and the Efficacy of  
22      Purifying Selection across Plant and Animal Species. *Molecular Biology*  
23      and *Evolution* 34: 1417-1428.
- 24   Chia, J. M., C. Song, P. J. Bradbury, D. Costich, N. de Leon *et al.*, 2012 Maize  
25      HapMap2 identifies extant variation from a genome in flux. *Nature*  
26      *Genetics* 44: 803-807.
- 27   Corbett-Detig, R. B., D. L. Hartl and T. B. Sackton, 2015 Natural Selection  
28      Constrains Neutral Diversity across A Wide Range of Species. *Plos Biology*  
29      13(4):e1002112..
- 30   Cvijovic, I., B.H. Good and M.M. Desai, 2018 The effect of strong purifying  
31      selection on genetic diversity. *Genetics* 209: 1235-1278.
- 32   Ellegren, H., and N. Galtier, 2016 Determinants of genetic diversity. *Nature*  
33      *Reviews Genetics* 17: 422-433.
- 34   Evans, L. M., G. T. Slavov, E. Rodgers-Melnick, J. Martin, P. Ranjan *et al.*, 2014  
35      Population genomics of *Populus trichocarpa* identifies signatures of  
36      selection and adaptive trait associations. *Nature Genetics* 46: 1089-1096.
- 37   Eyre-Walker, A., 2006 The genomic rate of adaptive evolution. *Trends in Ecology*  
38      & *Evolution* 21: 569-575.
- 39   Eyre-Walker, A., and P. D. Keightley, 2007 The distribution of fitness effects of  
40      new mutations. *Nature Reviews Genetics* 8: 610-618.
- 41   Eyre-Walker, A., and P. D. Keightley, 2009 Estimating the Rate of Adaptive  
42      Molecular Evolution in the Presence of Slightly Deleterious Mutations and  
43      Population Size Change. *Molecular Biology and Evolution* 26: 2097-2108.
- 44   Eyre-Walker, A., M. Woolfit and T. Phelps, 2006 The distribution of fitness effects  
45      of new deleterious amino acid mutations in humans. *Genetics* 173: 891-  
46      900.
- 47   Faivre-Rampant, P., G. Zaina, V. Jorge, S. Giacomello, V. Segura *et al.*, 2016 New  
48      resources for genetic studies in *Populus nigra*: genome-wide SNP

- 1 discovery and development of a 12k Infinium array. *Molecular Ecology*  
2 *Resources* 16: 1023-1036.
- 3 Fay, J. C., and C. I. Wu, 2000 Hitchhiking under positive Darwinian selection.  
4 *Genetics* 155: 1405-1413.
- 5 Galtier, N., 2016 Adaptive Protein Evolution in Animals and the Effective  
6 Population Size Hypothesis. *Plos Genetics* 12(1): e1005774.
- 7 Gillespie, J. H., 1999 The role of population size in molecular evolution.  
8 *Theoretical Population Biology* 55: 145-156.
- 9 Gillespie, J. H., 2000 Genetic drift in an infinite population: The  
10 pseudohitchhiking model. *Genetics* 155: 909-919.
- 11 Gillespie, J. H., 2001 Is the population size of a species relevant to its evolution?  
12 *Evolution* 55: 2161-2169.
- 13 Gillespie, J. H., 2004 *Population genetics : a concise guide*. Johns Hopkins  
14 University Press, Baltimore, Md.
- 15 Haller, B. C., and P. W. Messer, 2019 SLiM 3: Forward Genetic Simulations  
16 Beyond the Wright-Fisher Model. *Molecular Biology and Evolution* 36:  
17 632-637.
- 18 Huang, W., A. Massouras, Y. Inoue, J. Peiffer, M. Ramia *et al.*, 2014 Natural  
19 variation in genome architecture among 205 *Drosophila melanogaster*  
20 Genetic Reference Panel lines. *Genome Research* 24: 1193-1208.
- 21 James, J., D. Castellano and A. Eyre-Walker, 2017 DNA sequence diversity and the  
22 efficiency of natural selection in animal mitochondrial DNA. *Heredity* 118:  
23 88-95.
- 24 Jensen, J. D., B.A. Payseur, W. Stephan, C.F. Aquadro, M. Lynch *et al.*, 2018 The  
25 importance of the Neutral Theory in 1968 and 50 years on. *Evolution* 73:  
26 111-114. .
- 27 Jensen, J. D., Y. Kim, V. B. DuMont, C. F. Aquadro and C. D. Bustamante, 2005  
28 Distinguishing between selective sweeps and demography using DNA  
29 polymorphism data. *Genetics* 170: 1401-1410.
- 30 Jensen, J. D., B. A. Payseur, W. Stephan, C. F. Aquadro, M. Lynch *et al.*, 2019 The  
31 importance of the Neutral Theory in 1968 and 50 years on: A response to  
32 Kern and Hahn 2018. *Evolution* 73: 111-114.
- 33 Kern, A. D., and M. W. Hahn, 2018 The Neutral Theory in Light of Natural  
34 Selection. *Molecular Biology and Evolution* 35: 1366-1371.
- 35 Kimura, M., 1979 Model of Effectively Neutral Mutations in Which Selective  
36 Constraint Is Incorporated. *Proceedings of the National Academy of*  
37 *Sciences of the United States of America* 76: 3440-3444.
- 38 Kimura, M., 1983 *The Neutral Theory of Molecular Evolution*. Cambridge, UK:  
39 Cambridge Univ. Press.
- 40 Kimura, M., and T. Ohta, 1971 Protein Polymorphism as a Phase of Molecular  
41 Evolution. *Nature* 229: 467-469..
- 42 Koenig, D., J. Hagmann, R. Li, F. Bemm, T. Slotte *et al.*, 2018 Long-term balancing  
43 selection drives evolution of immunity genes in *Capsella*. *eLife* 8:e43606.
- 44 Kreitman, M., 1996 The neutral theory is dead. Long live the neutral theory.  
45 *Bioessays* 18: 678-683.
- 46 Lewontin, R. C., 1974 *The Genetic Basis of Evolutionary Change*. New York:  
47 Columbia University Press.

- 1 Mace, E. S., S. S. Tai, E. K. Gilding, Y. H. Li, P. J. Prentis *et al.*, 2013 Whole-genome  
2 sequencing reveals untapped genetic potential in Africa's indigenous  
3 cereal crop sorghum. *Nature Communications* 4:3320.
- 4 Martin, S. H., K. K. Dasmahapatra, N. J. Nadeau, C. Salazar, J. R. Walters *et al.*, 2013  
5 Genome-wide evidence for speciation with gene flow in *Heliconius*  
6 butterflies. *Genome Research* 23: 1817-1828.
- 7 Nei, M., Y. Suzuki and M. Nozawa, 2010 The Neutral Theory of Molecular  
8 Evolution in the Genomic Era. *Annual Review of Genomics and Human*  
9 *Genetics*, Vol 11 11: 265-289.
- 10 Novikova, P. Y., N. Hohmann, V. Nizhynska, T. Tsuchimatsu, J. Ali *et al.*, 2016  
11 Sequencing of the genus *Arabidopsis* identifies a complex history of  
12 nonbifurcating speciation and abundant trans-specific polymorphism.  
13 *Nature Genetics* 48: 1077-1082.
- 14 Ohta, T., 1972 Population Size and Rate of Evolution. *Journal of Molecular*  
15 *Evolution* 1: 305-314..
- 16 Ohta, T., 1973 Slightly Deleterious Mutant Substitutions in Evolution. *Nature*  
17 246: 96-98.
- 18 Ohta, T., 1992 The Nearly Neutral Theory of Molecular Evolution. *Annual Review*  
19 *of Ecology and Systematics* 23: 263-286.
- 20 Ohta, T., and J. H. Gillespie, 1996 Development of neutral and nearly neutral  
21 theories. *Theoretical Population Biology* 49: 128-142.
- 22 Pavlidis, P., and N. Alachiotis, 2017 A survey of methods and tools to detect  
23 recent and strong positive selection. *Journal of Biological Research-*  
24 *Thessaloniki* 24:7.
- 25 Posada, D., and T. R. Buckley, 2004 Model selection and model averaging in  
26 phylogenetics: Advantages of akaike information criterion and Bayesian  
27 approaches over likelihood ratio tests. *Systematic Biology* 53: 793-808.
- 28 R Core Team, 2018 R: A language and environment for statistical computing. R  
29 Foundation for Statistical Computing, pp. R Foundation for Statistical  
30 Computing, Vienna, Austria.
- 31 Sawyer, S.A. and D.L. Hartl, 1992 Population genetics of polymorphism and  
32 divergence. *Genetics* 132: 1161-1176.
- 33 Stanley, C. E., and R. J. Kulathinal, 2016 Genomic signatures of domestication on  
34 neurogenetic genes in *Drosophila melanogaster*. *Bmc Evolutionary*  
35 *Biology* 16:6.
- 36 Tajima, F., 1989 Statistical-Method for Testing the Neutral Mutation Hypothesis  
37 by DNA Polymorphism. *Genetics* 123: 585-595.
- 38 Tataru, P., M. Mollion, S. Glemin and T. Bataillon, 2017 Inference of Distribution  
39 of Fitness Effects and Proportion of Adaptive Substitutions from  
40 Polymorphism Data. *Genetics* 207: 1103-1119.
- 41 Walsh, B., and M. Lynch, 2018 *Evolution and Selection of Quantitative Traits*.  
42 Oxford University Press.
- 43 Weissman, D. B., and N. H. Barton, 2012 Limits to the Rate of Adaptive  
44 Substitution in Sexual Populations. *Plos Genetics* 8(6):e1002740.
- 45 Welch, J. J., A. Eyre-Walker and D. Waxman, 2008 Divergence and Polymorphism  
46 Under the Nearly Neutral Theory of Molecular Evolution. *Journal of*  
47 *Molecular Evolution* 67: 418-426.
- 48
- 49

1 **APPENDIX**

2

3 In a constant population with population size  $N_e$ ,  $\pi_S = 4N_e\mu$  and  $\pi_N$  is given by  
 4 (Sawyer and Hartl 1992):

5 
$$\pi_N = 2N_e\mu \int_0^1 2x(1-x)H(S, x)dx \quad (A1)$$

6 where

7 
$$H(S, x) = \frac{1-e^{-S(1-x)}}{x(1-x)(1-e^{-S})} \quad (A2)$$

8 is the mean time a new semidominant mutation of scaled selection coefficient  $S =$   
 9  $4N_e s$  spends between  $x$  and  $x + dx$  (Wright 1938). For constant selection  $S$ , by  
 10 integrating (A1) and dividing by  $4N_e\mu$ , we have:

11 
$$\frac{\pi_N}{\pi_S} = f(S) = \frac{2}{1-e^{-S}} - \frac{2}{S} \quad (A3)$$

12 (A3) is valid for both positive and negative fitness effect. If we consider only  
 13 beneficial mutations with a gamma distribution of effects, with mean  $S_b$  and

14 shape  $\beta_b$ :  $\phi(S_b, \beta, S) = e^{-\frac{S\beta_b}{S_b}} S^{\beta-1} \left(\frac{\beta_b}{S_b}\right)^{\beta_b} / \Gamma(\beta_b)$ , we can use the same approach

15 as Welch et al. (2008) to show that:

16 
$$\frac{\pi_N}{\pi_S} = \int_0^{\infty} f(S)\phi(S_b, \beta_b, S) dS$$
  

$$= \frac{1}{\beta_b-1} \left(\frac{\beta_b}{S_b}\right)^{\beta_b} \left( \xi\left(\beta_b-1, \frac{\beta_b}{S_b}+1\right) + (\beta_b-1)\xi\left(\beta_b, \frac{\beta_b}{S_b}\right) - \xi\left(\beta_b-1, \frac{\beta_b}{S_b}\right) \right) \quad (A4)$$

17 where  $\xi(x, y)$  is the Hurwith Zeta function. (A4) can be approximated under the  
 18 realistic assumption that  $\frac{\beta_b}{S_b} \ll 1$  and taking Taylor expansion of (A4) in  $\frac{\beta_b}{S_b}$   
 19 around 0. We thus obtain:

20 
$$\frac{\pi_N}{\pi_S} \approx (2\pi)^{\beta_b} \left(\frac{S_b}{\beta_b}\right)^{\beta_b} \quad (A5)$$

21 which leads to equation [eq. 2] in the main text.

| <b>species</b> | <b>#chromosom</b> | <b>#genes</b> | <b>slope (l)</b> | <b>R2</b> | <b>p.value</b> |
|----------------|-------------------|---------------|------------------|-----------|----------------|
| A. trichopoda  | 8                 | 9002          | -0.03079         | 0.0122    | 0.4706823      |
| A.thaliana     | 20                | 14308         | -0.13308         | 0.4698    | 0.00382        |
| S.bicolor      | 7                 | 12382         | -0.13228         | 0.5473    | 0.00116        |
| M.truncatula   | 20                | 7822          | -0.015393        | 0.0081939 | 0.51873        |
| P.nigra        | 18                | 8009          | -0.12091         | 0.19883   | 0.102593       |
| P.tremula      | 20                | 17530         | -0.165           | 0.6679    | 2.92e-05       |
| P.tremuloides  | 20                | 16777         | -0.1756          | 0.6351    | 4.4e-05        |
| P.euphratica   | 40                | 12739         | -0.033542        | 0.03494   | 0.3758         |
| P.pruinosa     | 40                | 15872         | 0.15714          | 0.5765    | 0.000812       |
| V.vinifera     | 20                | 10029         | -0.010585        | -0.002714 | 0.53938        |
| T. aestivum    | 5                 | 13135         | -0.1985          | 0.6614    | 4.00E-04       |
| C.sativus      | 19                | 8107          | -0.2008          | 0.37419   | 0.0346859      |
| C.hardwickii   | 10                | 8075          | -0.02948         | 0.005111  | 0.52121        |
| Z. mays        | 10                | 1676          | -0.1959          | 0.292498  | 0.0379831      |
| G.soja         | 20                | 23902         | 0.01296          | 0.00965   | 0.4587         |
| G.max          | 20                | 23721         | -0.005101        | 0.004733  | 0.43566        |
| C.sinensis     | 4                 | 10983         | -0.10496         | 0.38487   | 0.0164         |
| O.sativa       | 20                | 12416         | -0.00658         | -0.02686  | 0.6038         |
| O.rufipogon    | 11                | 6305          | -0.2551          | 0.6121    | 0.001          |
| O.glab         | 13                | 8849          | -0.09186         | 0.37368   | 0.0234         |
| O.barthii      | 9                 | 6133          | -0.06925         | 0.16368   | 0.1226006      |
| C.canephora    | 7                 | 11528         | 0.1991           | 0.5222    | 0.00106        |
| C. lanatus     | 10                | 6038          | -0.19304         | 0.18761   | 0.1244345      |
| M.esculenta    | 14                | 12536         | -0.01945         | 0.025044  | 0.386128       |
| H.vulgare      | 4                 | 6232          | 0.06568          | 0.12179   | 0.1669793      |
| C. grandiflora | 20                | 12667         | -0.2898          | 0.8196    | 3.39e-07       |
| P.dactylifera  | 20                | 14166         | -0.07643         | 0.240101  | 0.0538646      |
| S.lycopersicon | 5                 | 14665         | -0.1998          | 0.000184  | 0.6199         |
| S.huaylasense  | 6                 | 14684         | -0.2914          | 0.000216  | 0.6211         |
| H.sapiens      | 20                | 18191         | 0.105273         | 0.046502  | 0.38661        |
| P.troglodytes  | 20                | 16333         | -0.12841         | 0.08777   | 0.28757        |
| P.paniscus     | 20                | 15233         | -0.195248        | 0.12181   | 0.2393388      |
| G. gorilla     | 20                | 12348         | -0.053642        | 0.028298  | 0.412998       |
| G. graueri     | 6                 | 13334         | -0.087203        | 0.09082   | 0.326128       |
| P. abelii      | 10                | 15925         | -0.06348         | 0.001645  | 0.49322        |
| P. pygmaeus    | 10                | 15570         | -0.11097         | 0.08732   | 0.263535       |
| P. Papio       | 4                 | 13335         | 0.11973          | 0.3219    | 0.0179         |
| P. Ursinus     | 4                 | 13283         | 0.1747           | 0.4082    | 0.00409        |
| C. Jacchus     | 10                | 12859         | 0.2204           | 0.5907    | 0.000123       |
| C. familiaris  | 20                | 12670         | -0.16431         | 0.125731  | 0.2395         |
| C. lupus       | 8                 | 12665         | -0.1555          | 0.11165   | 0.199697       |
| B. taurus      | 18                | 13714         | -0.09646         | 0.02092   | 0.37583        |
| O. latipes     | 20                | 5478          | -0.01919         | 0.02083   | 0.4351         |



|                   |    |                 |          |           |
|-------------------|----|-----------------|----------|-----------|
| O. niloticus      | 6  | 4939 -0.372     | 0.08717  | 0.1503    |
| G. gorilla        | 20 | 2142 -0.3293    | 0.136386 | 0.233182  |
| D.melanogaster    | 20 | 3686 -0.4243    | 0.7958   | 3.94e-06  |
| C. briggsae       | 10 | 2497 -0.20332   | 0.18928  | 0.1225722 |
| M. castaneus      | 20 | 19126 -0.022442 | 0.006106 | 0.48217   |
| A. arabiensis     | 20 | 6763 -0.2387    | 0.6917   | 7.67e-05  |
| A. epiroticus     | 20 | 6558 -0.2873    | 0.5709   | 0.00118   |
| A. farauti        | 20 | 6264 -0.3115    | 0.4937   | 0.00448   |
| A. funestus       | 12 | 6867 -0.4141    | 0.7947   | 5.43e-07  |
| A. melas          | 12 | 7148 -0.1821    | 0.30286  | 0.0201097 |
| A. merus          | 20 | 6665 -0.2608    | 0.6139   | 0.000194  |
| A. quadriannuatus | 20 | 6620 -0.1478    | 0.4223   | 0.0117    |
| H. melpomene      | 8  | 6567 -0.2719    | 0.7328   | 4.29e-06  |
| H. chinoneus      | 8  | 6437 -0.3324    | 0.7134   | 1.83e-05  |
| H. timareta       | 8  | 6434 -0.2142    | 0.6244   | 0.000243  |
| H. pardalinus     | 4  | 6459 -0.3673    | 0.6618   | 7.2e-05   |

| <b>S_d</b>  | <b>beta</b> |
|-------------|-------------|
| 1.85e+22    | 0.021322045 |
| 208.0715692 | 0.262947282 |
| 273522.5492 | 0.10331407  |
| 3520000     | 0.076671273 |
| 7510000     | 0.081667091 |
| 27081.48075 | 0.13677788  |
| 9513.471827 | 0.156690454 |
| 3.00E+08    | 0.052221393 |
| 1740000     | 0.074766962 |
| 2920000     | 0.082468092 |
| 13631.07439 | 0.117827362 |
| 3760000     | 0.097784926 |
| 4390000     | 0.101323245 |
| 18769.08991 | 0.162600552 |
| 5070000     | 0.075207188 |
| 5.35e+48    | 0.01        |
| 1.93e+09    | 0.048424245 |
| 9.12e+13    | 0.028516702 |
| 3190000     | 0.074351324 |
| 8.11e+16    | 0.026769072 |
| 8.94e+23    | 0.02054373  |
| 5640000     | 0.067941908 |
| 357.9045775 | 0.200255858 |
| 1.69e+15    | 0.036875397 |
| 4540000     | 0.079329761 |
| 954.9860899 | 0.283390544 |
| 20400000    | 0.067902271 |
| 43400000    | 0.056347066 |
| 5.97e+53    | 0.011645271 |
| 10002.76568 | 0.12535229  |
| 9517.764368 | 0.142391471 |
| 9478.600653 | 0.126442144 |
| 6536.50279  | 0.136471801 |
| 3920000     | 0.076851226 |
| 176632.7316 | 0.112477663 |
| 49157.40682 | 0.117581567 |
| 66300000    | 0.057833203 |
| 69900000    | 0.062022659 |
| 1.09e+44    | 0.009999999 |
| 58538.91338 | 0.148629986 |
| 123933.2123 | 0.141824095 |
| 1.94e+09    | 0.075685116 |
| 1290000     | 0.106989872 |

389319.476 0.109072768  
2990000 0.129853019  
3974.566141 0.347297266  
435.2635717 0.242110286  
1890000 0.122589716  
3966.393817 0.317476941  
3844.612974 0.243166406  
27491.72162 0.202916231  
35258.79598 0.267911067  
29934.62801 0.189863622  
2218.056088 0.309945788  
10813.37126 0.274193762  
15840.97789 0.26019666  
9256.968993 0.284517894  
1790000 0.159669111  
1.49e+12 0.083838116

| Species                | filtering*                 | #chromosomes | slope (l) | l_boots(95%)   |
|------------------------|----------------------------|--------------|-----------|----------------|
| <i>A. thaliana</i>     | 10, 0, 0, 1, 100, 0.1      | 10           | 0.477     | (0.435, 0.521) |
| <i>A. lyrata</i>       | 10, 0, 0, 1, 100, 0.1      | 10           | 0.499     | (0.585, 0.41)  |
| <i>C. rubella</i>      | 10, 0, 0,30,100,0.5        | 10           | 0.43      | (0.387, 0.466) |
| <i>C. grandiflora</i>  | 10, 0, 0, 1, 100, 0.5      | 16           | 0.521     | (0.359, 0.695) |
| <i>S. habrochaites</i> | 1e-20, 200, 0, 1, 100, 0.1 | 7            | 0.205     | (0.08, 0.319)  |
| <i>S. huaylasense</i>  | 1e-20, 200, 0, 1, 100, 0.1 | 4            | 0.536     | (0.423, 0.656) |
| <i>S. propinquum</i>   | 10, 0, 0, 1, 10, 0.1       | 7            | 0.374     | (0.32, 0.426)  |
| <i>Z. mays</i>         | 10, 0, 0, 1, 100, 1        | 10           | 0.292     | (0.262, 0.319) |
| <i>P. trichocarpa</i>  | 10, 0, 0, 1, 10, 0.1       | 16           | 0.421     | (0.277, 0.598) |
| <i>D. melanogaster</i> | 10, 0, 0, 1, 10, 0.1       | 20           | 0.7       | (0.62, 0.768)  |
| <i>H. timareta</i>     | 10, 0, 0, 1, 100, 0.1      | 8            | 0.435     | (0.39, 0.476)  |

\*: for filtering we performed following criteria in order: e-value, bit-score, query coverage, quer  
different filtering criteria were chose for each species in order to maximize the linearity (R2 colu

| <b>p-value</b> | <b>R2</b> | <b>r2_boots(95%)</b> | <b>beta</b> | <b>S_d</b> | <b>p_b</b>  | <b>S_b</b>  |
|----------------|-----------|----------------------|-------------|------------|-------------|-------------|
| 3.60E-07       | 0.975     | (0.938, 0.995)       | 0.3225751   | -222.003   | 7.98E-06    | 0.0123487   |
| 4.02E-08       | 0.88      | (0.765, 0.947)       | 0.3446372   | -352.4657  | 1.95E-05    | 0.0787558   |
| 4.78E-11       | 0.953     | (0.899,0.98)         | 0.3877494   | -280.1572  | 0.05308512  | 0.000439121 |
| 1.20E-04       | 0.677     | (0.457, 0.839)       | 0.3030656   | -645.0785  | 0.0117206   | 10.58446    |
| 0.0207338      | 0.381     | (0.0495, 0.69)       | 0.2311101   | -98565.41  | 0.1430495   | 0.000428568 |
| 3.76E-06       | 0.79      | (0.612, 0.9)         | 0.309072    | -78719.78  | 0.1444625   | 0.005878293 |
| 1.00E-08       | 0.904     | (0.816, 0.959)       | 0.260165    | -284.4627  | 2.93E-06    | 0.007746282 |
| 1.30E-10       | 0.942     | (0.893, 0.972)       | 0.1848003   | -2525.62   | 1.86E-05    | 0.004883847 |
| 1.56E-04       | 0.679     | (0.43, 0.853)        | 0.2146055   | -5353.714  | 0.03788233  | 0.9679363   |
| 1.26E-11       | 0.95      | (0.909, 0.978)       | 0.41152     | -2175.355  | 0.00831     | 99.45153    |
| 1.60E-09       | 0.914     | (0.845, 0.961)       | 0.2103758   | -94578.76  | 0.001163899 | 0.1059159   |

y length, num of low quality sites, and percentage of low quality sites  
 (mn) for slope calculation

| <b>pi0/pi4</b> | <b>Pi0</b> | <b>Pi4</b> | <b>mutation_TD</b> | <b>TD0</b>   | <b>TD4</b>   |              |
|----------------|------------|------------|--------------------|--------------|--------------|--------------|
| 0.233257195    | 0.0010212  | 0.004378   | 7                  | -0.380789691 | -0.485021266 | -0.164922928 |
| 0.183629727    | 0.0019619  | 0.010684   | 7                  | -0.60281367  | -0.742612505 | -0.228547355 |
| 0.244241748    | 0.0003722  | 0.0015239  | 7                  | -0.275451105 | -0.347128820 | -0.145517780 |
| 0.2            | 0.0012     | 0.006      | 7                  | -1.06321752  | -1.185242445 | -0.706171082 |
| 0.203418054    | 0.0006963  | 0.003423   | 5.2                | 0.216722329  | 0.194374941  | 0.251706312  |
| 0.175546448    | 0.00257    | 0.01464    | 5.2                | -0.17066493  | -0.175206441 | -0.155516855 |
| 0.252857677    | 0.0006769  | 0.002677   | 10                 | -0.103947788 | -0.177934072 | -0.000858227 |
| 0.331255083    | 0.002444   | 0.007378   | 30                 | -0.521557492 | -0.569127092 | -0.375852577 |
| 0.220240157    | 0.000763   | 0.0034644  | 37.5               | -0.426512977 | -0.509090545 | -0.155437972 |
| 0.090948175    | 0.0011635  | 0.012793   | 2.8                | -0.729042402 | -1.089469855 | -0.273371182 |
| 0.109142452    | 0.00154    | 0.01411    | 2.9                | -0.099778948 | -0.188178832 | 0.008172753  |

| <b>rhoD</b> | <b>rhoD0</b> | <b>rhoD4</b> |
|-------------|--------------|--------------|
| 20.09847    | 13.34179434  | 21.201422194 |
| 30.13018    | 23.38621     | 36.52527     |
| 15.75497946 | 15.92928593  | 3.05971295   |
| 23.02078179 | 9.1258675    | 46.27447     |
| -5.36317782 | -5.25213432  | -6.14003074  |
| -8.58607658 | -10.4053676  | -4.48237127  |
| 60.03524    | 53.42481     | 63.11604     |
| -0.38718011 | -2.28800574  | 2.64622553   |
| 79.19642    | 66.73075636  | 85.323726616 |
| 7.406745777 | -1.309081e+  | 12.662693295 |
| 6.583048719 | 3.93145947   | 6.870488613  |

**Table S3** Test for the invariance of DFE parameter estimates across bins by comparing the log-likelihoods of independent estimates for each bin against those of shared estimates.

| Species                | $\Delta \log\text{lk}$<br>(full DFE) |                    |           | $\Delta \log\text{lk}$<br>(gamma DFE) |                    |           |
|------------------------|--------------------------------------|--------------------|-----------|---------------------------------------|--------------------|-----------|
|                        |                                      | $\Delta \text{Df}$ | p-value   |                                       | $\Delta \text{Df}$ | p-value   |
| <i>A. thaliana</i>     | 1361.4                               | 16                 | 0         | 1005.9                                | 8                  | 0         |
| <i>A. lyrata</i>       | 1327.6                               | 16                 | 0         | 695.9                                 | 8                  | 3.19e-295 |
| <i>C. rubella</i>      | 704.8                                | 16                 | 1.45e-290 | 578.6                                 | 8                  | 1.65e-244 |
| <i>C. grandiflora</i>  | 1018.5                               | 16                 | 0         | 778.2                                 | 8                  | 0         |
| <i>S. habrochaites</i> | 204.4                                | 16                 | 5.10e-77  | 196.4                                 | 8                  | 6.54e-80  |
| <i>S. huaylasense</i>  | 558.5                                | 16                 | 9.27e-228 | 526.6                                 | 8                  | 5.07e-222 |
| <i>S. propinquum</i>   | 678.4                                | 16                 | 3.30e-279 | 543.7                                 | 8                  | 1.95e-229 |
| <i>Z. mays</i>         | 721.8                                | 16                 | 7.00e-298 | 616.3                                 | 8                  | 8.84e-261 |
| <i>P. trichocarpa</i>  | 284.4                                | 16                 | 9.83e-111 | 307.5                                 | 8                  | 1.45e-127 |
| <i>D. melanogaster</i> | 169.9                                | 16                 | 1.26e-62  | 502.7                                 | 8                  | 1.07e-211 |
| <i>H. timareta</i>     | 671.5                                | 16                 | 2.88e-276 | 543.7                                 | 8                  | 2.01e-229 |
